1 **Behavioral correction to prevent overhydration and increase survival by larvae of the net-**  
2 **spinning caddisflies in relation to water flow**

3

4 Jay A. Yoder<sup>1</sup>, Joshua B. Benoit<sup>2,\*</sup>, Blake W. Nelson<sup>1</sup>, Leighanne R. Main<sup>1</sup> and Jon P. Bossley<sup>3</sup>

5

6 <sup>1</sup>Department of Biology, Wittenberg University, Springfield, OH 45501, USA, <sup>2</sup>Department of  
7 Biological Sciences, University of Cincinnati, Cincinnati, OH 45221, USA and <sup>3</sup>Environmental  
8 Science Graduate Program, The Ohio State University, Columbus, OH 43210, USA

9

10 \* Author for correspondence (joshua.benoit@uc.edu)

11

12 **ABSTRACT**

13 We report behavioral regulation of body water content in caddisfly larvae, *Hydropsyche morosa*  
14 and *Cheumatopsyche pettiti*, by selecting microhabitats with different water flow rates. The  
15 purpose was to examine features necessary for survival in the same apparent habitat, because  
16 both co-exist in riffle areas of freshwater streams. Both species are highly sensitive to water loss  
17 due to high water loss rates and depend on immersion in fresh water (hypo-osmotic) to maintain  
18 water stores. In contrast to *C. pettiti*, *H. morosa* is larger, retains water more effectively, and  
19 features reduced water loss rates with suppressed activation energies. When *H. morosa* was  
20 confined to areas of low or no water flow, overhydration led to rapid mortality, whereas the same  
21 conditions favored water balance maintenance and survival in *C. pettiti*. In attraction bioassays,  
22 *H. morosa* moved and remained within areas of high water flow and *C. pettiti* preferred areas  
23 with low water flow. Because water flow rates are unlikely to directly impact water gain, the  
24 mechanism responsible for increased survival and water balance maintenance is likely related to  
25 the impact of water flow on oxygen availability or differences in feeding ecology.

26

27 **KEY WORDS: Water exchange, Hyperosmotic, Attraction, Fresh water, Biological**  
28 **indicator**

29

30 **Running title: Water balance of caddisfly larvae**

31

## 32 INTRODUCTION

33 Whole organism water balance is an ecologically-defining attribute and limits the ability of  
34 insects to function properly in the absence of water resources (Hadley, 1994). Habitat adaptation  
35 involves a complementary relationship between water balance characteristics and modifications  
36 of behavior relevant to preventing drying out or overhydrating (Hadley, 1994). To maintain  
37 water balance, water gain ( $m_S$ ) must be equal to water loss ( $m_T$ ) as defined by Wharton (1985).  
38 Net water gain occurs when  $m_S > m_T$ , and net water loss occurs when  $m_T > m_S$ . The goal is to  
39 maintain body water ( $\Delta m = 0$ ), a condition that permits proper functioning and development due  
40 to a lack of dehydration-induced stress. In a freshwater habitat, the  $m_S$  component is exceedingly  
41 large for an aquatic insect in that they are hyperosmotic to fresh water. The water activity ( $a_w$ ) of  
42 the freshwater environment,  $1.00a_w$ , is greater than the  $0.99a_w$  activity of the insect's body water  
43 ( $0.990$ - $0.997a_w$ ; Wharton, 1985; Sigal et al., 1991). Thus, the activity gradient of fresh water  
44 results in a continuous water increase to the body by simple diffusion (Kohn, 1965; Wharton,  
45 1985). To prevent overhydration, insects must either suppress cuticular permeability to prevent  
46 water intake or increase the rate of water removal.

47 Net-spinning caddisfly larvae (Trichoptera: Hydropsychidae) reside at the bottoms of  
48 freshwater ponds and streams on cobblestones or limbs. They have a preference for shallow riffle  
49 areas with low to high current flow, in cooler, shaded areas (Wiggins, 1996; Bouchard, 2004).  
50 Caddisfly larvae thrive within high quality fresh water and are utilized as bioindicators (Bonada  
51 and Williams, 2002 and references therein). Appreciable amounts of water are obtained from  
52 their moisture-rich food, predominately algae and detritus from the stream bottom (Snyder and  
53 Hendricks, 1995) and from drinking (Sutcliffe, 1961). The emphasis for maintaining water  
54 balance by caddisfly larvae focuses on increasing the water loss component,  $m_T$ , to counteract  
55 the continual water influx that occurs naturally from ingestion and inward diffusion by being  
56 submerged. Despite the application of caddisfly larvae to environmental studies, little work has  
57 been done on the water balance physiology of caddisfly larvae. The exception is Sutcliffe's  
58 (1961) work on salt balance, where it is shown that caddisfly larvae are hyperosmotic and water  
59 is attracted to them.

60 In this paper, we determined water balance characteristics and conducted attraction  
61 bioassays in relation to water flow for larvae of two caddisfly species that regularly co-occur in  
62 freshwater streams, *Hydropsyche morosa* and *Cheumatopsyche pettiti*. Few experiments have

63 examined species comparisons based on water balance characteristics of insect larvae with the  
64 exception of mosquitoes (Bradley, 1987, 2008) and midge larvae (Benoit et al. 2007; Kikawada  
65 et al., 2008; Elnitsky et al., 2009). Comparative studies of water balance studies of species that  
66 reside within the same habitats have also been minimal (fruit flies, Aggarwal et al., 2013;  
67 Parkash et al., 2011, 2013; tsetse flies, Kleynhans and Terblanche, 2011; Terblanche et al., 2006,  
68 2008; beetles, Benoit et al. 2005; mites, Benoit et al. 2008). Our hypothesis is that larvae of  
69 different caddisfly species may have different water balance profiles, which likely necessitate  
70 different habitat requirements to maintain water balance.

71

## 72 **RESULTS**

### 73 **Analysis of stream water and flow rates**

74 Physicochemical data of stream water were specific conductance ( $524.5 \pm 12.8 \mu\text{S}/\text{cm}$ ),  
75 dissolved oxygen ( $13.6 \pm 0.59 \text{ mg}/\text{L}$  and  $105.9 \pm 2.2 \%$ ), temperature ( $22.06 \pm 0.11^\circ\text{C}$ ), and pH  
76 ( $8.10 \pm 0.34$ ) ( $N = \text{ten measurements/ each of three sites, mean} \pm \text{s.e.m.}$ ). Average stream flow  
77 velocity was  $4.1 \pm 1.7 \text{ km}/\text{h}$  taken near the bottom, middle, and top of the water column ( $N = \text{ten}$   
78  $\text{measurements/ each of three sites, mean} \pm \text{s.e.m.}$ ). Water flow velocities for experimental airflow  
79 rates were  $3 \text{ L}/\text{min} = 2.4 \pm 0.9 \text{ km}/\text{h}$ ;  $6 \text{ L}/\text{min} = 5.7 \pm 0.7 \text{ km}/\text{h}$ ; and  $12 \text{ L}/\text{min} = 9.1 \pm 1.6 \text{ km}/\text{h}$   
80 ( $N = 15 \text{ measurements, mean} \pm \text{s.e.m.}$ ). Oxygen content of the stream water after it was filtered  
81 and autoclaved was  $14.1 \pm 0.38 \text{ mg}/\text{L}$  and  $108.3 \pm 2.7 \%$ , indicating that water in bioassays was  
82 supersaturated with oxygen ( $> 100\% \text{ DO}$ ).

83

### 84 **Water balance characteristics**

85 *Hydropsyche morosa* was larger than *C. pettiti* in initial mass, dry mass, and water mass ( $P <$   
86  $0.05$  in each pairwise comparison; Table 1). In all cases, the water mass was a positive correlate  
87 of the dry mass ( $r^2 \geq 0.93$  for *H. morosa*;  $r^2 \geq 0.91$  for *C. pettiti*;  $P < 0.001$ ). Both species had  
88 similar percentage body water content around 66% ( $P > 0.05$ ; Table 1). Thus, *H. morosa* is  
89 larger and both species have similar relative body water pools that are available for exchange  
90 with their surroundings.

91 Water loss rates were more rapid for *C. pettiti* than *H. morosa* (Fig. 2, Table 1;  $P < 0.05$ ).  
92 Once *C. pettiti* lost 19.6% of their body water they were alive, but they were unable to coordinate  
93 their movements and self-right (Table 1). The dehydration tolerance of *C. pettiti* was 19.6% and

94 the dehydration tolerance of *H. morosa* was 23.02% ( $P > 0.05$ ; Table 1). Moribund *H. morosa*  
95 and *C. pettiti* died if placed at 100% RH or in stream water, evidence that they had sustained an  
96 irreversible level of water loss at their dehydration tolerance limit.

97 At 37°C there is a critical transition temperature (CTT) for *C. pettiti* as denoted by the  
98 biphasic change on the Arrhenius plot (Fig. 3). The activation energy changes from 14.5 kJ/mol  
99 in the low temperature range to 33.2 kJ/mol in the high temperature range ( $P < 0.05$ ; Table 1).  
100 Water loss shows direct Boltzmann dependence in both low and high temperature ranges ( $r^2 =$   
101 0.98 and 0.94, respectively;  $P < 0.001$ ; Fig. 3). Ramp-up and ramp-down determinations yielded  
102 nearly identical activation energies as given in Table 1, producing highly reproducible CTTs at  
103 or near 36°C (data not shown). The 35°C CTT for *H. morosa* was not significantly different from  
104 the CTT for *C. pettiti* ( $P > 0.05$ ; Table 1). For *H. morosa*, there was a change in activation  
105 energy that separated the low temperature range (9.1 kJ/mol) from the high temperature range  
106 (26.4 kJ/mol) (Table 1, Fig. 3;  $P < 0.05$ ) as a regular Boltzmann temperature function ( $r^2 \geq 0.92$ ;  
107  $P < 0.001$ ). Activation energies were lower for *H. morosa* than *C. pettiti* in both low and high  
108 temperature ranges ( $P < 0.05$ ; Table 1).

109

### 110 **Survival estimates and mass changes**

111 An experimental arena was designed using a stream water-filled specimen dish affixed with  
112 tubing at one side of the dish (sector one) that created a high water flow current by bubbling air  
113 (Fig. 1). 'Direct water flow' refers to the side of the dish (sector one) beneath the air tube where  
114 there is a high rate of water flow (sector one). 'Indirect water flow' refers to the opposite side of  
115 the dish (sector four) where the water flow is less rapid because the tube is aimed into sector one.

116 Greatest survival for *C. pettiti* occurred in indirect water flow (sector four, Fig. 1), where  
117 larvae survived 8.0 days (4.5 days for 50% of larvae) compared to 5.5 days (3.5 days for 50% of  
118 larvae) in direct water flow ( $P < 0.05$ ; Fig. 4). Still water conditions also had a positive effect on  
119 survival of *C. pettiti* (survival for 7.0 days, 4.0 days for 50% of larvae), with approximately a day  
120 less than in indirect water flow ( $P < 0.05$ ; Fig. 4). In contrast, direct water flow resulted in the  
121 greatest survival for *H. morosa* compared to indirect water flow: 6.5 days (4.7 days for 50% of  
122 larvae) versus 5.0 days (2.7 days for 50% of larvae), respectively (Fig. 4;  $P < 0.05$ ). Survival was  
123 negatively impacted in *H. morosa* by still water, which shortened survival by approximately two

124 days (survival for 3.0 days, 1.8 days for 50% of larvae) compared to survival in indirect water  
125 flow ( $P < 0.05$ ; Fig. 4).

126 *Cheumatopsyche pettiti* gained more water over time in the direct water flow than the  
127 indirect water flow (Fig. 5;  $P < 0.05$  in each pairwise comparison). Daily water gains in still  
128 water were between the extremes of direct flow ( $P < 0.05$  in each pairwise comparison) and  
129 indirect flow (Fig. 5;  $P < 0.05$  in each pairwise comparison). For *H. morosa*, the largest daily  
130 water gains occurred for larvae in still water (Fig. 5;  $P < 0.05$  in each pairwise comparison).  
131 There were also large amounts of daily water gain for *H. morosa* that was held in indirect water  
132 flow compared to direct water flow (Fig. 5;  $P < 0.05$  in each pairwise comparison). Under still  
133 and indirect water flow conditions for *H. morosa*, mass measurements were discontinued once  
134 larvae died after 2-3 days (Fig. 5). Survival for *C. pettiti* did not begin to decline dramatically  
135 until after the 72 hour time period of the experiment (Fig. 5).

136

### 137 **Behavioral responses emphasizing attraction**

138 Moving water of 3 L/min resulted in larger numbers of *C. pettiti* in sector one (Fig. 1) within a  
139 day compared to untreated (no tube) or no water flow (airflow tube alone) controls (Fig. 6;  $P <$   
140  $0.05$ ). In all cases, a slight attraction by *C. pettiti* to sector one occurred within one hour when  
141 water was flowing at any speed compared to still water controls ( $P < 0.05$ ; Fig. 6). The one and  
142 two hour responses by *H. morosa* to the low 3 L/min flow rate were similar to untreated and  
143 airflow tube-only controls ( $P > 0.05$ ), but increased substantially at 24 hours ( $P < 0.05$ ; Fig. 6).  
144 Water flow at 6 L/min and 12 L/min by *H. morosa* recruited large numbers of larvae within one  
145 hour ( $P < 0.05$ ), attracting and retaining nearly all of the larvae (Fig. 6). The heightened intensity  
146 of attraction by *H. morosa* in high speed water of 6 L/min and 12 L/min remained elevated at  
147 two and 24 hours (Fig. 6).

148

### 149 **DISCUSSION**

150 The important conclusion from this study is that larvae of *H. morosa* and *C. pettiti* display clear  
151 microhabitat preferences with regard to water flow. When placed in non-preferred microhabitats,  
152 larvae become overhydrated, thus indicating that inability to maintain water balance could drive  
153 species-specific microhabitat preferences. Specifically, *H. morosa* has a low water loss rate and  
154 prefers to reside in areas with high water flow. For *C. pettiti*, water loss rates are higher and

155 residence in areas with low water flow permits them to maintain water balance. There is also  
156 thermal suitability information as implied by the critical transition temperature (CTT). The CTT  
157 is within the 32-39°C of upper thermal tolerance limits for caddisfly larvae (deKozlowki and  
158 Bunting, 1981; Moulton et al., 1993), thus mortality at high temperature can be attributed to a  
159 sharp increase in water loss, or water gain, at or above the CTT. This water balance/behavior  
160 information is relevant to use of caddisfly larvae as bioindicators of high quality water for  
161 nutrient cycling, toxicological monitoring, and thermal disturbances (Bonada and Williams,  
162 2002, and references therein) since turnovers in water exchange differentially affect each species.

163 From a water balance perspective, different flow rates are preferred for the two species.  
164 Here we have attempted to provide a linkage between the water balance characteristics and  
165 preferred flow rates, if there is one. *Cheumatopsyche pettiti* and *H. morosa* rely on continuous  
166 water influx from their fresh water habitat. Their dehydration tolerance limit is unlikely to be  
167 exceeded, because water is continuously entering into the body by inward diffusion, drinking,  
168 and feeding on moist food. The continuous water influx is balanced by large body water losses  
169 (water efflux) so that the larva functions properly at the body water content. *Cheumatopsyche*  
170 *pettiti* is thus highly permeable to water and they are prevented from overhydrating by having  
171 high water loss rates. *Hydropsyche morosa* with its much lower water loss rate requires that the  
172 amount gained must be restricted, which suggests the presence of water-proofed cuticular barrier  
173 that is unique to *H. morosa* that blocks the amount of water entry (water influx). The difference  
174 in water loss rate implies that the emphasis is on water elimination for *C. pettiti* and water  
175 retention for *H. morosa*. When matched with behavioral preference, implications are that the  
176 water flow rate conditions of the microhabitat are opposite of the water turnover of the larva.  
177 This is something that we have also found for another aquatic invertebrate, the branchiobdellids  
178 (Annelida: Clitellata) that live on freshwater crayfish (Yoder et al., 2007). The species that loses  
179 water the fastest (*Cambarincola fallax*) clusters in locales with least amount of water movement  
180 on the crayfish, at subrostral sites at the base of the eyestalks. In contrast, a species that loses  
181 water the slowest (*C. ingens*) is found preferentially in the high water flow area of the gills  
182 (Yoder et al., 2007). Even though both caddisfly species have high cuticular water loss rates and  
183 require direct contact with pure water, the stream flow rates significantly impact their ability to  
184 maintain water balance.

185 A high water flow rate is unlikely to have an appreciable impact on the amount of water  
186 that is gained by an insect, because the supply of water is not being replenished (water is the  
187 supply). Hydrodynamic pressure in a high flow rate is greatest on one side of the insect (side hit  
188 directly by the current) but low on the other side of the insect (not exposed to current), and this  
189 would be predicted to yield a similar net effect on water gain ( $m_s$ ) as still or low flow rate where  
190 the hydrodynamic pressure is more equalized over the insect surface. Indeed, we found that both  
191 *H. morosa* and *C. pettiti* can survive in still water, hence, they can evidently maintain proper  
192 body water content within tolerable limits. This is supported by field data, where *H. morosa* and  
193 *C. pettiti* have been collected in pool areas and from ponds despite the propensity by both species  
194 to be more abundant in riffle areas (Bouchard, 2004). These considerations indicate that the  
195 amount of water influx is constant whether *C. pettiti* is in a low or high water flow. The amount  
196 of water influx for *H. morosa* is less as a tradeoff for their lower water loss rate, because they  
197 cannot eliminate excess water gain as effectively as *C. pettiti*. There is enhancement of survival  
198 when water gain is the least, and this occurs in regions of high flow for *H. morosa* and low flow  
199 for *C. pettiti*. *Hydropsyche morosa* and *C. pettiti* function better (prolonged survival) when there  
200 is at least some water flow in the area, and especially a high water flow for *H. morosa*.

201 The problem of desiccation impacting survival is a challenge encountered by many  
202 aquatic insects when the stream dries. Larvae of *H. morosa* and *C. pettiti* are quite active, hence  
203 lose water rapidly, and their small body size through surface area to volume properties further  
204 exacerbates this dilemma. The high water loss rates and modest dehydration tolerance limit of *H.*  
205 *morosa* and *C. pettiti* necessarily imply that they are hygric-suited and adapted for a moisture-  
206 rich environment (Hadley, 1994). Many aquatic insects and other aquatic invertebrates prevent  
207 dehydrating and remain viable by staying in constant, direct contact with a moisture-rich surface  
208 (Hadley, 1994). There is little interpretative value ecologically concerning body water content  
209 (i.e., not all aquatic insects have high body water contents), and for these caddisfly species it  
210 approximates the mean water content (69%) of most insects (Hadley, 1994). Under drought  
211 conditions, the most likely scenario is that the caddisfly larvae crawl underground (Wiggins,  
212 1996; Bouchard, 2004). The differences we note in water loss rate and behavior between *H.*  
213 *morosa* and *C. pettiti* should also be thought of as important resistance mechanisms that promote  
214 survival of these caddisfly larvae in intermittent streams. These caddisfly larvae are driven

215 underneath the soil surface in order to satisfy an absolute moisture requirement because of their  
216 high water loss rate.

217         Although our results may be a direct consequence of water balance, there are  
218 physiological functions impacted by stream flow rates that likely have an impact on survival and  
219 habitat preferences. The most likely possibility is that the choice experiments (Fig. 6) could be  
220 explained, fully or in part, by behavioral regulation of oxygen availability. A high water flow  
221 rate and increase in hydrodynamic pressure would replenish the supply of oxygen at a faster rate.  
222 Higher flowing water would bring more oxygen past the caddisfly's filamentous abdominal gills  
223 (there are no open spiracles in Trichoptera; Wiggins, 1996). Perhaps the larger body size of *H.*  
224 *morosa* requires faster water flow rates to maintain oxygen delivery. If the oxygen requirement is  
225 not met (i.e., happens in still or low water flow), then mechanisms responsible for maintaining  
226 water balance begin to malfunction for energetic reasons. Overhydration and eventual death  
227 would be the physiological consequence of water balance mechanisms breaking down. It also  
228 seems reasonable to suggest that proper excretory function in these species requires optimal flow  
229 conditions. The chloride epithelium of caddisfly larvae likely requires specific flow rates to  
230 regulate chloride uptake, which is essential for maintaining water balance. There is insufficient  
231 information about the excretory system of caddisflies to confirm this possibility. Additionally,  
232 the negative effect on water balance in still or low flowing water could also be an artifact of  
233 some primary function that recruits *H. morosa* to higher flowing waters that could relate to  
234 behavioral differences between *C. pettiti* (preference and suitability for still or low water flow) in  
235 feeding ecology or in predator avoidance.

236

## 237 **MATERIALS AND METHODS**

### 238 **Collection of caddisfly larvae and stream water**

239 Stream locales were selected by random block design within a 3 meter transect in riffle areas of a  
240 third-order segment of Buck Creek, Clark Co., OH, USA. Larvae were collected using kick nets  
241 (BioQuip Products, Rancho Dominguez, CA, USA). Larvae were identified as *Cheumatopsyche*  
242 *pettiti* and *Hydropsyche morosa* and were in the final, fifth instar (keys by Merritt and Cummins,  
243 1996; Wiggins, 1996). Slide-mounted vouchers are under specimen lot WUIC Nos. 1209-1229  
244 (Wittenberg University, Springfield, OH, USA). Handling of larvae was done with an aspirator.  
245 Dead larvae were those that did not move (legs or mouthparts) and failed to respond to stimuli



246 and crawl five body lengths when prodded when examined by 40x microscopy. Stream water  
247 was collected into autoclave-sterilized (121°C, 15 psi), 1.0 L glass volumetric flasks, and filtered  
248 (3M Aqua-Pure, 3M Co., St. Paul, MN, USA) before use. Physicochemical data of the stream  
249 water was collected on site with a water quality sonde (YSI Environmental, Yellow Springs, OH,  
250 USA) using a Flowprobe (Global Water, White Plains, NY, USA) to determine flow rate.

251

## 252 **Equipment, instrumentation and experimental conditions**

253 Relative humidity was maintained in glass desiccators (6.0 L; Fisher) containing anhydrous  
254 CaSO<sub>4</sub> for 0% RH (1.5 x 10<sup>-2</sup>% RH; W. A. Hammond Drierite Co., Xenia, OH, USA; Toolson,  
255 1978) and deionized double-distilled (DI) water for 100% RH. Relative humidity was measured  
256 with a hygrometer (s.d. ± 0.5% RH; Thomas Scientific, Philadelphia, PA, USA). An  
257 electrobalance (CAHN, Ventron Co., Cerritos, CA, USA; precision and accuracy were s.d. ± 0.2  
258 µg and ± 6 µg at 1 mg, respectively) was used for measuring mass changes of larvae. Larvae  
259 were dried to complete dryness (constant mass for three days) in a 90°C drying oven (Blue M  
260 Electric Co., Chicago, IL, USA; Hadley 1994). Basic observations were conducted at 20 ± 1°C,  
261 15h:9h, L:D photoperiod. Temperature for other studies varied less than ± 0.5°C.

262 Figure 1 shows the six-sector bioassay that we modified from a statistically valid, short  
263 range Petri plate attraction bioassay developed by Arlian and Vyszenski-Moher (1995) and Allan  
264 and Sonenshine (2002). A straight sided flat bottom specimen dish (19 cm i.d. x 7cm deep =  
265 1986 L) was placed over top a paper template that had been scored into six, equal 47.2 cm<sup>2</sup>  
266 sectors. The specimen dish was filled with 1 L of filtered stream water. A 1.0 cm Tygon tubing  
267 (Fisher) attached to a source of compressed air and flowmeter for regulation (Rochester Gauges,  
268 Dallas, TX, USA) created a bubbling water flow into sector one. No water flow of 0 L/min (still  
269 water conditions) served as a control. An additional control was a specimen dish without the  
270 airflow tube. Stream water, freshly autoclave-sterilized culture dishes, and unconditioned larvae  
271 that had not been previously used in bioassays were utilized for each experiment.

272 All experiments were replicated ten times, ten larvae per replicate (total  $N = 100$  larvae),  
273 with each replicate coming from a different collection site within the stream. Data are the mean ±  
274 s.e.m.

275

## 276 **Determination of water balance characteristics**

277 Following Wharton's (1985) standard gravimetric methods and equations, the rate of water loss  
278 at 0% RH is an accurate measure of the water loss rate as it would occur while submerged in  
279 water (experimental determination using  $^3\text{HOH}$ ; Arlian and Staiger, 1979). Each larva was  
280 monitored individually, without anesthesia or enclosure, and weighed in less than one minute.  
281 All experiments use 4-6% pre-desiccated larvae so that mass changes reflect changes in body  
282 water levels (Arlian and Eckstrand, 1975; Wharton, 1985).

283 To determine water content and water loss rate, a larva was weighed (= fresh, initial  
284 mass,  $f$ ), placed at 20°C and 0% RH, and re-weighed for five readings of mass. The larva was  
285 then dried to constant mass ( $d$  = dry mass) in the 90°C drying oven. Dry mass was subtracted  
286 from each mass measurement to convert the mass measurement into the water mass ( $m$ ; Eq. 1):  $m$   
287 =  $f - d$ . Percentage body water content was calculated (Eq. 2): percentage  $m = 100 (f - d)/f$ . Water  
288 loss rate (integumental plus respiratory water loss) was calculated by fitting mass measurements  
289 to the equation (Eq. 3):  $m_t = m_0 e^{-kt}$ ;  $m_t$  is the water mass at any time  $t$ ,  $m_0$  is the initial water mass,  
290 and  $-k$  is the water loss. Fresh mass, dry mass, water mass and percentage body water content  
291 was based on the same cohort of 100 larvae. The water loss rate was based on different cohort of  
292 100 larvae.

293 To determine dehydration tolerance, a larva was weighed, held at 0% RH and 20°C, and  
294 re-weighed, each time checking the larva for its ability to self-right and crawl five body lengths.  
295 At the critical mass ( $m_c$ ), the larva could move but could not coordinate its movements and failed  
296 to self-right and crawl when placing it at 100% RH or in 15 ml of water. Percentage change in  $m$   
297 =  $100 (m_c - m_0)/m_0$  (Eq. 4) was used to calculate the dehydration tolerance limit. A separate  
298 cohort of 200 larvae was used for determining the dehydration tolerance limit: 100 larvae for a  
299 rescue attempt by placing larvae at 100% RH and a separate group of 100 larvae for a rescue  
300 attempt by placing larvae in stream water.

301 To determine activation energy ( $E_a$ ) for water loss, water loss rates were determined (Eq.  
302 3) with freshly killed larvae and temperature was varied. Larvae were killed by the freeze-thaw  
303 method. Water loss rate was determined for the same larva experiencing a temperature increase  
304 (ramp-up) or a temperature decrease (ramp-down). The Arrhenius equation (Eq. 5) was used to  
305 determine the activation energy as described:  $k = A e^{-E_a/(RT)}$ , where  $k$  is passive water loss rate,  $E_a$   
306 is activation energy,  $R$  is universal gas constant,  $T$  is absolute temperature, and  $A$  is steric,  
307 frequency factor (Gibbs, 2002). Significance of activation energy is controversial (Yoder et al.,

2005), but there is agreement on the occurrence of a critical transition temperature (CTT) when the activation energy changes (Gibbs, 2002). Water loss rate accelerates abruptly above the CTT (Gibbs, 2002). Each water loss rate determination was based on a cohort of 100 larvae in the activation energy calculation to total  $N = 600$  larvae. The ramp-up and ramp-down experiment each utilized 100 larvae, tracking the water loss rate for the same cohort of 100 larvae going up, or down, the temperature scale.

314

### 315 **Determination of survival and attraction potential**

316 A cage for housing a larva was made with a 1.5 ml polypropylene microcentrifuge tube (Fisher) perforated with 30 holes to permit water entry into the cage. The cage was anchored with a spot of glue (Loctite low-odor; Henkel Co., Rocky Hill, CT, USA) onto a plain glass microscope slide (3" x 1" x 1mm; Fisher) to keep the cage submerged while in the bioassay arena (Fig. 1). The larva was out of test conditions for less than one minute for weighing and examination of motor activity, ability to self-right and crawl five body lengths at 40x. Percentage change in mass was calculated: (Eq. 5):  $m = 100 (m_t - m_0)/m_0$ , where  $m_t$  is the water mass at any time  $t$  and  $m_0$  is the initial water mass. Treatments included placing the caged larva in non-moving water (0 flow rate) in sector one in the bioassay arena (Fig. 1), as well as in moving water with a flow rate of 3 L/min. We selected 3 L/min flow rate, because this flow rate produces a more localized flow in sector one with little to no flow in sector four compared to 6 L/min or 12 L/min that are too high. In the bioassay arena (Fig. 1), a comparison was done where the caged larva was placed in sector four ('indirect water flow'), thereby preventing the larva from being close to the source of moving water from the tubing located in sector one ('direct water flow'). Survivorship curves and mass measurements were done 20 times, five larvae at a time, each in a separate cage, to total  $N = 100$ .

332 Additionally, uncaged larvae were introduced, ten at time, at the center of the bioassay arena (Fig. 1). Counts of larvae in sector one (Fig. 1) were made after one hour, two hours, and 24 hours during the photophase. Treatments included exposure of larvae to 3 L/min, 6 L/min and 12 L/min water flows. There were two still water controls, one with the airflow tube in the water with 0 L/min airflow and one with no airflow tube in the water to rule out potential right-left bias. Data are the responses of 100 larvae, based on ten replicates of ten larvae.

338

**339 Statistics**

340 Alpha value was adjusted to a level of significance of 0.05. Arcsin transformation was done for  
341 percentage data. Water balance data were compared with an analysis of covariance (ANCOVA).  
342 Water loss rates and activation energies were compared with a test for the equality of slopes of  
343 several regressions (Sokal and Rohlf, 1995). The number of larvae in sector one in the attraction  
344 bioassays was analyzed by a means comparison, paired *t* test following an arcsin transformation  
345 (Sokal and Rohlf, 1995). We did not want to have confounding effects if the survival data were  
346 non-parametric, so we utilized the Kaplan-Meier survival curve with a log rank test after an  
347 Abbott's correction (Sokal and Rohlf, 1995). Statistical software was SPSS 14.0 for Windows  
348 (IBM, Armonk, NY, USA), Microsoft Excel (Redmond, WA, USA), and Minitab (Chicago, IL,  
349 USA).

350

**351 Acknowledgements**

352 Not applicable.

353

**354 Competing interests**

355 Not applicable.

356

**357 Author contributions**

358 J. A.Y. conceived, designed and supervised experiments, collected and analyzed data, interpreted  
359 the results, and wrote the manuscript. J. B. B., B. W. N. and L. R. Main carried out experiments,  
360 collected specimens, analyzed data, and edited and proofread the manuscript. J. P. Bossley did  
361 the initial taxonomic identification of the caddisfly larvae and was involved in proofreading the  
362 manuscript. All authors have approved of this manuscript with confirmation in writing.

363

**364 Funding**

365 Funding for this project was provided, in part, by research grants to B. W. N. and L. R. M. from  
366 Wittenberg University.

367

**368 Supplementary material**

369 Not applicable.

370  
371  
372  
373  
374  
375  
376  
377  
378  
379  
380  
381  
382  
383  
384  
385  
386  
387  
388  
389  
390  
391  
392  
393  
394  
395  
396  
397  
398  
399

## References

- Aggarwal, D. D., Ranga, P., Kalra, B., Parkash, R., Rashkovetsky, E. and Bantis, L. E.** (2013). Rapid effects of humidity acclimation on stress resistance in *Drosophila melanogaster*. *Comp. Biochem. Physiol. A.* **166**, 81-90.
- Allan, S. A. and Sonenshine, D. E.** (2002). Evidence of an assembly pheromone in the black-legged deer tick, *Ixodes scapularis*. *J. Chem. Ecol.* **28**, 15-27.
- Arlian, L. G. and Eckstrand, I. A.** (1975). Water balance in *Drosophila pseudoobscura*, and its ecological implications. *Ann. Entomol. Soc. Am.* **68**, 827-832.
- Arlian, L. G. and Staiger, T. E.** (1979). Water balance in the semiaquatic beetle, *Peltodytes muticus*. *J. Comp. Biochem. Physiol. A.* **62**, 1041-1047.
- Arlian, L. G. and Vyszynski-Moher, D. L.** (1995). Responses of *Sarcoptes scabiei* var. *canis* (Acari: Sarcoptidae) to lipids of mammalian skin. *J. Med. Entomol.* **32**, 34-41.
- Benoit, J. B., Yoder, J. A., Rellinger, R. J. Ark, J. T. and Keeney, G. D.** (2005) Prolonged maintenance of water balance by adult females of the American spider beetle, *Mezium affine* Boieldieu, in the absence of food and water resources. *J. Insect Physiol.* **51**, 565-573.
- Benoit, J. B., Lopez-Martinez, G., Michaud, M. R., Elnitsky, M. A., Lee, R. E., Jr. and Denlinger, D. L.** (2007). Mechanisms to reduce dehydration stress in the Antarctic midge, *Belgica antarctica*. *J. Insect Physiol.* **53**, 656-667.
- Benoit, J. B., Yoder, J. A., Lopez-Martinez, G., Elnitsky, M. A., Lee, R. E., Jr. and Denlinger, D. L.** (2008). Adaptations for the maintenance of water balance by three species of Antarctic mites. *Polar Biol.* **31**, 539-547.

- 400 **Bonada, N. and Williams, D. D.** (2002). Exploration of the utility of fluctuating asymmetry as  
401 an indicator of river condition using larvae of the caddisfly *Hydropsyche morosa* (Trichoptera:  
402 Hydropsychidae). *Hydrobiol.* **481**, 147-156.
- 403
- 404 **Bouchard, R. W., Jr.** (2004). Guide to Aquatic Macroinvertebrates of the Upper Midwest. St.  
405 Paul: University of Minnesota.
- 406
- 407 **Bradley, T. J.** (1987) Physiology of osmoregulation in mosquitoes. *Ann. Rev. Entomol.* **32**, 439-  
408 462.
- 409
- 410 **Bradley, T. J.** (2008) Saline-water insects: ecology, physiology and evolution. In *Aquatic*  
411 *Insects: Challenges to Populations.* (ed. J. Lancaster and R. A. Biers), pp. 20-35. UK: CAB  
412 International.
- 413
- 414 **deKozlowski, S. J. and Bunting, D. L., II.** (1981). A laboratory study on the thermal tolerance  
415 of four southeastern stream insect species (Trichoptera, Ephemeroptera). *Hydrobiol.* **79**, 141-  
416 145.
- 417
- 418 **Elnitsky, M. A., Benoit, J. B., Lopez-Martinez, G., Denlinger, D. L. and Lee, R. E., Jr.**  
419 (2009). Osmoregulation and salinity tolerance in the Antarctic midge, *Belgica antarctica*:  
420 seawater exposure confers enhanced tolerance to freezing and dehydration. *J. Exp. Biol.* **212**,  
421 2864-2871.
- 422
- 423 **Gibbs, A. G.** (2002). Lipid melting and cuticular permeability: new insights into an old problem.  
424 *J. Insect Physiol.* **48**, 391-400.
- 425
- 426 **Hadley, N. F.** (1994). Water Relations of Terrestrial Arthropods. New York: Academic Press.
- 427
- 428 **Kikawada, T., Saito, A., Kanamori, Y., Fujita, M., Snigórska, K., Watanabe, M. and**  
429 **Okuda, T.** (2008). Dehydration-inducible changes in expression of two aquaporins in the  
430 sleeping chironomid, *Polypedilum vanderplanki*. *Biochim. Biophys. Acta.* **1778**, 514-520.

- 431
- 432 **Kleynhans, E. and Terblanche, J. S.** (2011). Complex interactions between temperature and  
433 relative humidity on water balance of adult tsetse (Glossinidae, Diptera): implications for climate  
434 change. *Front. Physiol.* **2**:74.
- 435
- 436 **Kohn, P. G.** (1965). Tables of some physical and chemical properties of water. In *The State and*  
437 *Movement of Water in Living Organisms* (ed. E. Fogg), pp. 291-318. New York: Cambridge  
438 University Press.
- 439
- 440 **Merritt, R. W. and Cummins, K. W.** (1996). An Introduction to the Aquatic Insects of North  
441 America. Dubuque: Kendall Hunt Publishing.
- 442
- 443 **Moulton, S. R., II, Beitinger, T. L., Stewart, K. W. and Currie, R. J.** (1993). Upper  
444 temperature tolerance of four species of caddisflies (Insecta: Trichoptera). *J. Freshwater Biol.* **8**,  
445 193-198.
- 446
- 447 **Parkash, R., Aggarwal, D. D., Kalra, B. and Ranga, P.** (2011). Divergence of water balance  
448 mechanisms in two melanic *Drosophila* species from the western Himalayas. *Comp. Biochem.*  
449 *Physiol. A.* **158**, 531-541.
- 450
- 451 **Parkash, R., Aggarwal, D. D., Singh, D., Lambhod, C. and Ranga, P.** (2013). Divergence of  
452 water balance mechanisms in two sibling species (*Drosophila simulans* and *D. melanogaster*):  
453 effects of growth temperatures. *J. Comp. Physiol. B.* **183**, 359-378.
- 454
- 455 **Sigal, M. D., Machin, J. and Needham, G. R.** (1991). Hyperosmotic oral fluid secretion during  
456 active water vapour absorption and during desiccation-induced storage-excretion by the unfed  
457 female tick *Amblyomma americanum*. *J. Exp. Biol.* **157**, 585-591.
- 458
- 459 **Snyder, C. D. and Hendricks, A. C.** (1995). Effect of seasonally changing feeding habits on  
460 whole-animal mercury concentrations in *Hydropsyche morosa* (Trichoptera: Hydropsychidae).  
461 *Hydrobiol.* **299**, 115-123.

- 462
- 463 **Sokal, R. R. and Rohlf, F. J.** (1995). *Biometry: The Principles and Practice of Statistics in*  
464 *Biological Research*. San Francisco: W. H. Freeman.
- 465
- 466 **Sutcliffe, D. W.** (1961). Studies on salt and water balance in caddis larvae (Trichoptera): I.  
467 Osmotic and ionic regulation of body fluids in *Limnephilus affinis* Curtis. *J. Exp. Biol.* **38**, 501-  
468 519.
- 469
- 470 **Terblanche, J. S., Clusella-Trullas, S., Deere, J. A. and Chown, S. L.** (2008). Thermal  
471 tolerance in a south-east African population of the tsetse fly *Glossina pallidipes* (Diptera:  
472 Glossinidae): implications for forecasting climate change impacts. *J. Insect Physiol.* **54**, 114-127.
- 473
- 474 **Terblanche, J. S., Klok, C. J., Krafur, E. S. and Chown, S. L.** (2006). Phenotypic plasticity  
475 and geographic variation in thermal tolerance and water loss of the tsetse *Glossina pallidipes*  
476 (Diptera: Glossinidae): implications for distribution modelling. *Am. J. Trop. Med. Hyg.* **74**, 786-  
477 794.
- 478
- 479 **Toolson, E. C.** (1978). Diffusion of water through the arthropod cuticle: thermodynamic  
480 consideration of the transition phenomenon. *J. Therm. Biol.* **3**, 69-73.
- 481
- 482 **Wharton, G. W.** (1985). Water balance of insects. In *Comprehensive Insect Physiology,*  
483 *Biochemistry and Pharmacology*, Vol. 4. (ed. G. A. Kerkut and L. I. Gilbert), pp. 565-603.  
484 Oxford: Pergamon Press.
- 485
- 486 **Wiggins, G. B.** (1996). *Larvae of the North American Caddisfly genera (Trichoptera)*. Toronto:  
487 University of Toronto Press.
- 488
- 489 **Yoder, J. A., Benoit, J. B., Rellinger, E. J. and Ark, J. T.** (2005). Letter to the Editors: Critical  
490 transition temperature and activation energy with implications for arthropod cuticular  
491 permeability. *J. Insect Physiol.* **51**, 1063-1065.
- 492



493 **Yoder, J. A., Tank, J. L., Brown, B. L. and Hobbs, H. H. III.** (2007). Water exchange  
 494 pertaining to host attachment sites and stream preference in crayfish-associated branchiobdellids,  
 495 *Cambarincola fallax* and *Cambarincola ingens* (Annelida: Clitellata). *Hydrobiologia* **592**, 523-  
 496 533.

497

498 **TABLES**

499

500 **Table 1. Water balance characteristics of larvae of the caddisfly, *Cheumatopsyche pettiti***  
 501 **and *Hydropsyche morosa*.** Values are the mean  $\pm$  s.e.m. ( $N = 100$ , ten replicates of ten larvae  
 502 each or at each of the six test temperatures in the activation energy calculation).

503

| 504 Characteristic                          | <i>C. pettiti</i> | <i>H. morosa</i> | cf. Fig. |
|---------------------------------------------|-------------------|------------------|----------|
| 506 Water content                           |                   |                  |          |
| 507 Initial mass, $f$ (mg)                  | 11.03 $\pm$ 0.46  | 41.74 $\pm$ 0.32 |          |
| 508 Dry mass, $d$ (mg)                      | 3.84 $\pm$ 0.09   | 13.62 $\pm$ 0.11 |          |
| 509 Water mass, $m$ (mg)                    | 7.19 $\pm$ 0.36   | 28.12 $\pm$ 0.44 |          |
| 510 Water content, $m/d$ (mg)               | 1.87              | 2.06             |          |
| 511 Water content (%)                       | 65.19 $\pm$ 0.52  | 67.37 $\pm$ 0.61 |          |
| 512 Water loss                              |                   |                  |          |
| 513 20°C (%/min)                            | 0.45 $\pm$ 0.02   | 0.27 $\pm$ 0.05  | 2        |
| 514 Dehydration tolerance                   |                   |                  |          |
| 515 Water mass when moribund, $m_c$ (mg)    | 5.78 $\pm$ 0.19   | 21.65 $\pm$ 0.15 |          |
| 516 Dehydration tolerance limit (%)         | 19.61 $\pm$ 0.49  | 23.02 $\pm$ 0.62 |          |
| 517 Critical transition temperature (°C)    | 37.1 $\pm$ 1.2    | 34.7 $\pm$ 1.8   | 3        |
| 518 Activation energy, $E_a$ (kJ/mol) < CTT | 14.5 $\pm$ 0.5    | 9.1 $\pm$ 0.7    | 3        |
| 519 Activation energy, $E_a$ (kJ/mol) > CTT | 33.2 $\pm$ 0.9    | 26.4 $\pm$ 0.6   | 3        |

520

521

522 **FIGURE LEGENDS**

523

524

525 **Fig. 1. Experimental set up for exposing different water flow rates to larvae,**  
526 ***Cheumatopsyche pettiti* and *Hydropsyche morosa*.** The airflow tube was fixed to an airflow  
527 detector/regulator attached to a laboratory source of filtered compressed air. Photo credit: B.  
528 Nelson and L. Main.

529

530 **Fig. 2. Proportion of water mass lost by larvae, *Cheumatopsyche pettiti* and *Hydropsyche***  
531 ***morosa*, at 20°C, 0% RH.** Slope of the regression line is the water loss rate:  $m_t$ , water mass at  
532 any time  $t$ , and  $m_0$ , initial water mass. Error bars lie within confines of graph symbols ( $\pm$  s.e.m  $\leq$   
533 0.011). Each point is the mean of 100 larvae.

534

535 **Fig. 3. Water loss-temperature relationship for freshly killed larvae, *Cheumatopsyche pettiti***  
536 **and *Hydropsyche morosa*.** Slope of the regression is  $-E_a/R$  for calculating the activation energy:  
537  $K$ , absolute temperature;  $E_a$ , activation energy;  $R$ , gas constant. Error bars are within symbols  
538 used on the graph ( $\pm$  s.e.m.  $\leq$  0.004). Each point is the mean of 100 larvae.

539

540 **Fig. 4. Survivorship curves for starved, caged larvae of *Cheumatopsyche pettiti* and**  
541 ***Hydropsyche morosa* exposed to different water flows using the set up as in Figure 1 (20°C,**  
542 **15h:9h, L:D), with a flow rate of 3 L/min going into sector one.** Still, no water flow (0 L/min;  
543 caged larva placed in sector one, but airflow turned off); direct, caged larva placed in sector one,  
544 exposure to high water flow from airflow tube; indirect, caged larva placed in sector four with  
545 airflow occurring in sector one. Each point is the mean of 100 larvae ( $\pm$  s.e.m.  $\leq$  5.8).

546

547 **Fig. 5. Changes in body water mass under exposure to water flow (20°C, 15h:9h, L:D) for**  
548 **larvae, *Cheumatopsyche pettiti* and *Hydropsyche morosa*, set up in the bioassay described by**  
549 **Figure 1.** Flow rate was set at 3 L/min going into sector one. Larvae were caged during exposure  
550 in sector one (direct), sector four (indirect), or sector one (still; no water flow). Larvae were  
551 taken out of cages for mass determinations. Each point is the mean of 100 larvae ( $\pm$  s.e.m.  $\leq$  2.1).

552

553 **Fig. 6. Attraction to sector one in response to water flows by larvae, *Cheumatopsyche pettiti***  
554 **and *Hydropsyche morosa* (experimental set up is shown in Fig. 1; 20°C, 15h:9h, L:D).**

555 Untreated, no airflow tube was inserted into the water; 0 L/min, airflow tube inserted in water,  
556 but airflow was turned off. Larvae were introduced at the center of the arena. Each test exposure  
557 is the mean of 100 larvae ( $\pm$  s.e.m.  $\leq$  4.3).

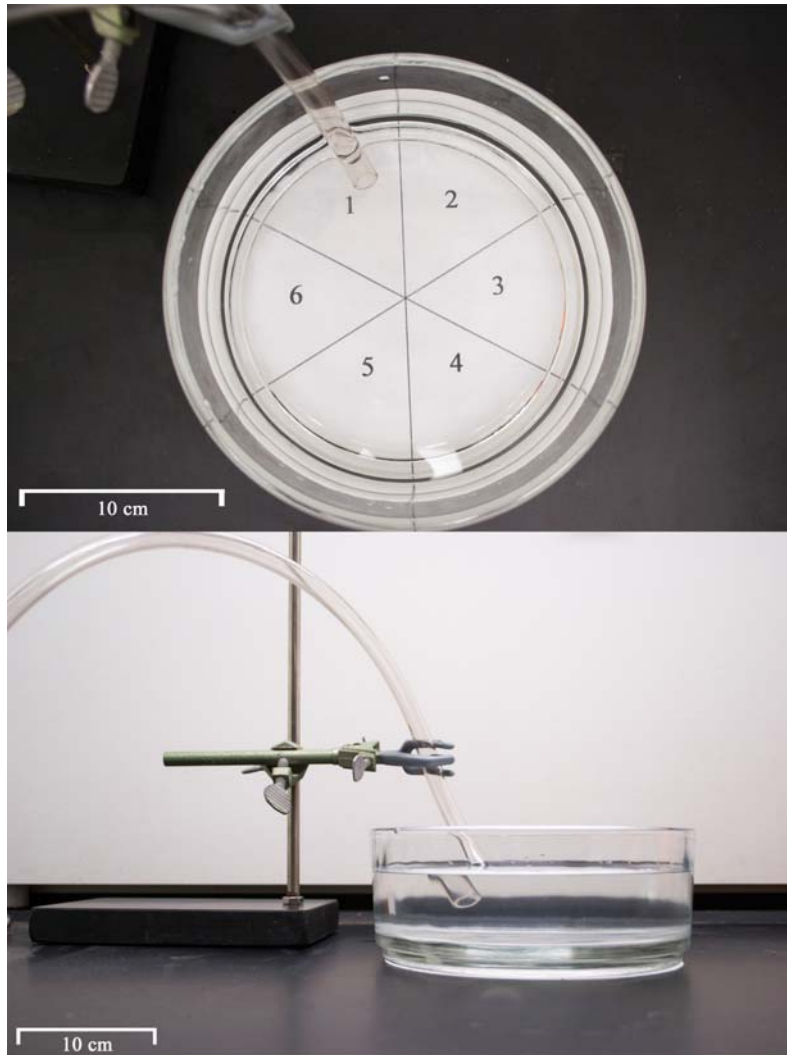

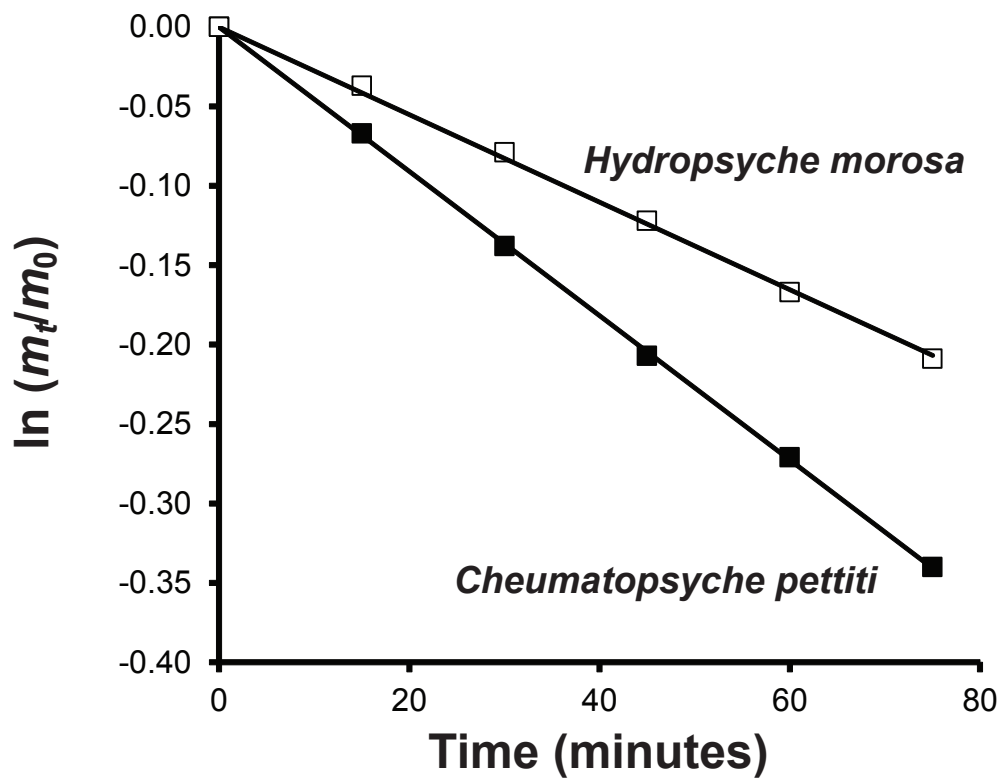

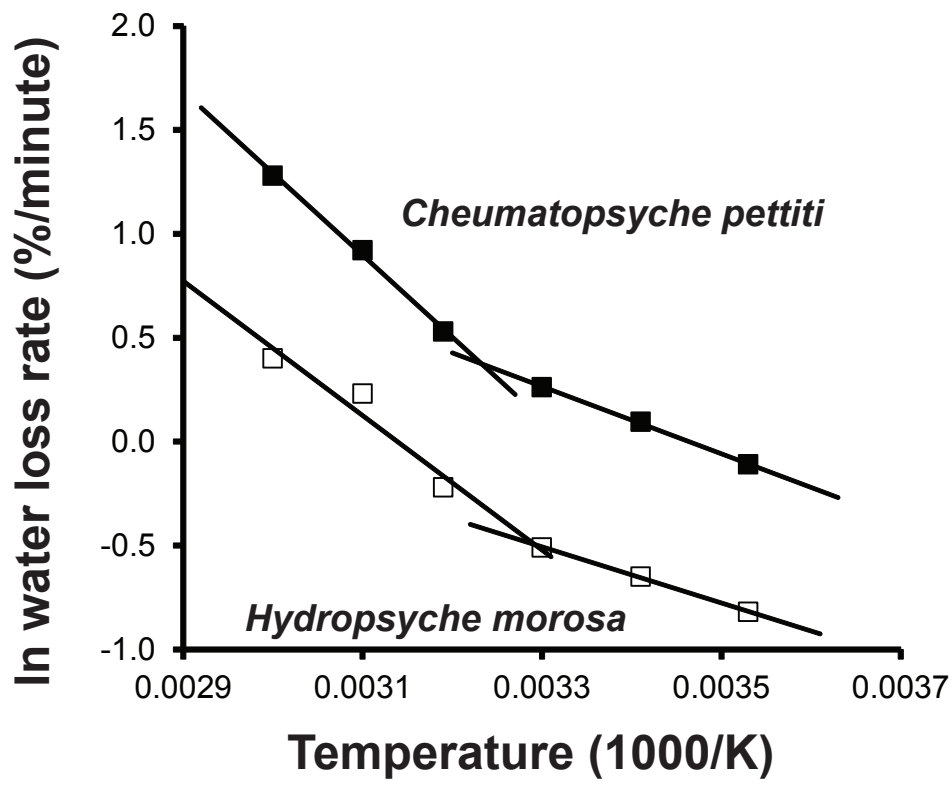

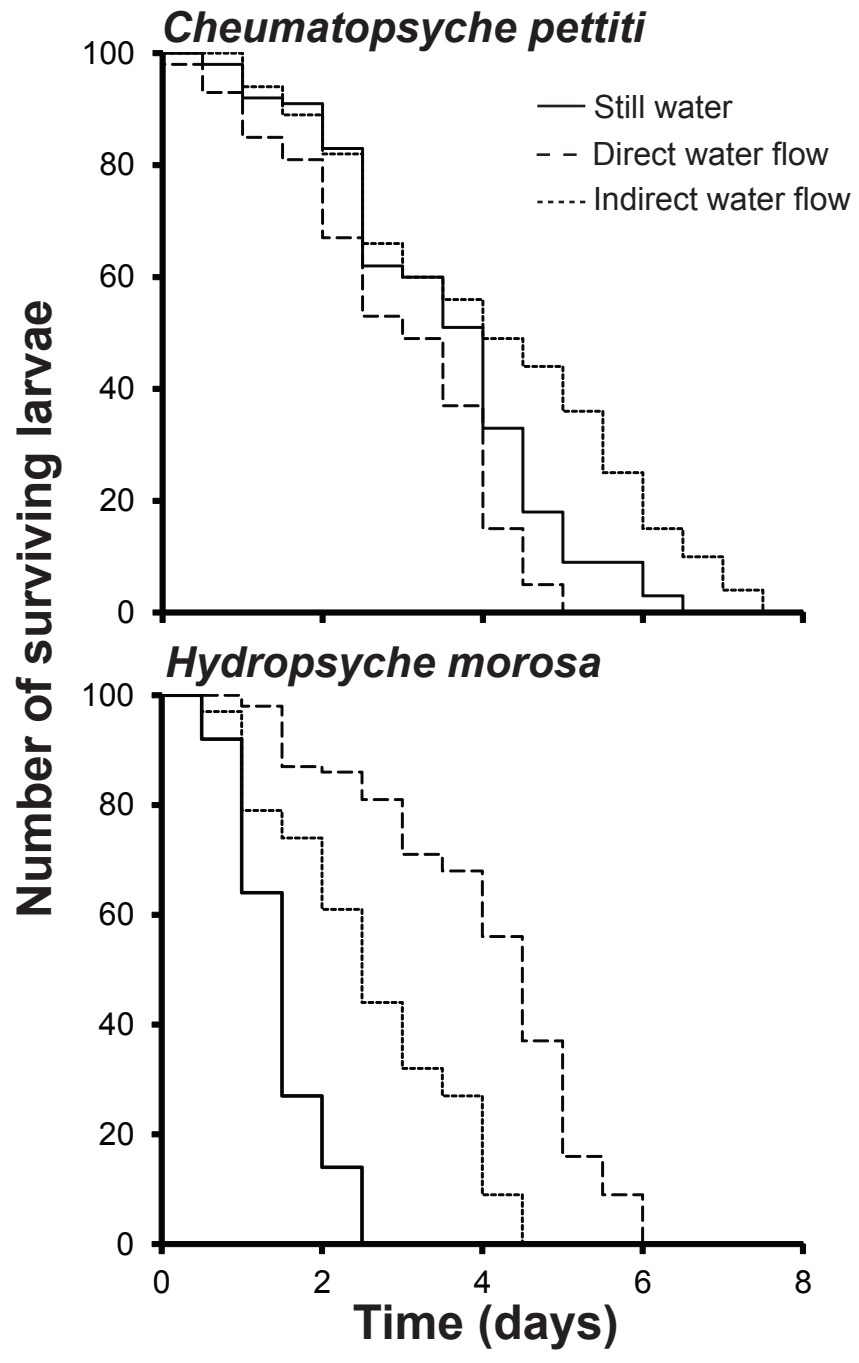

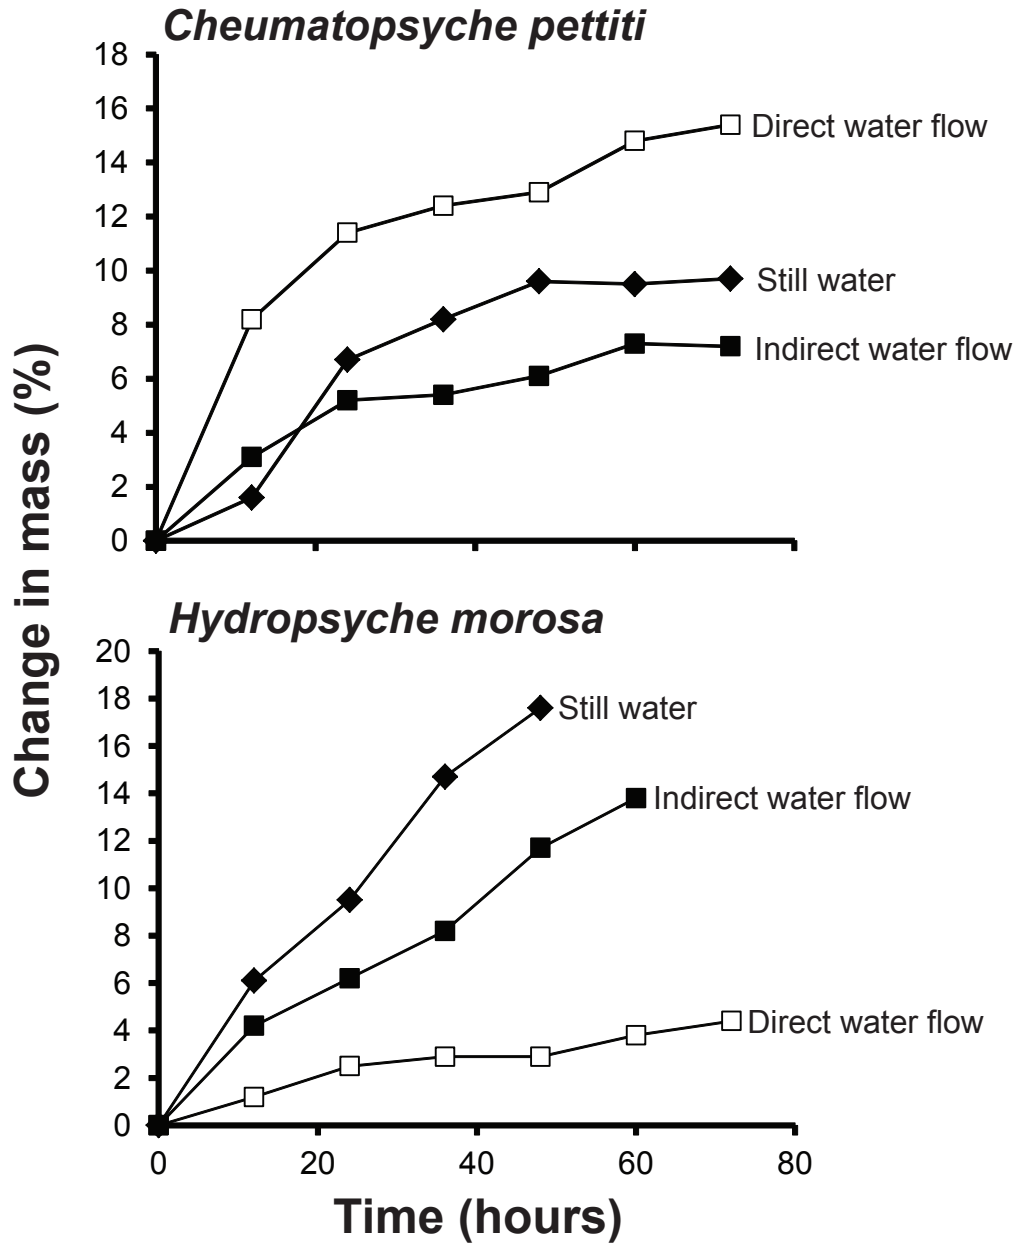



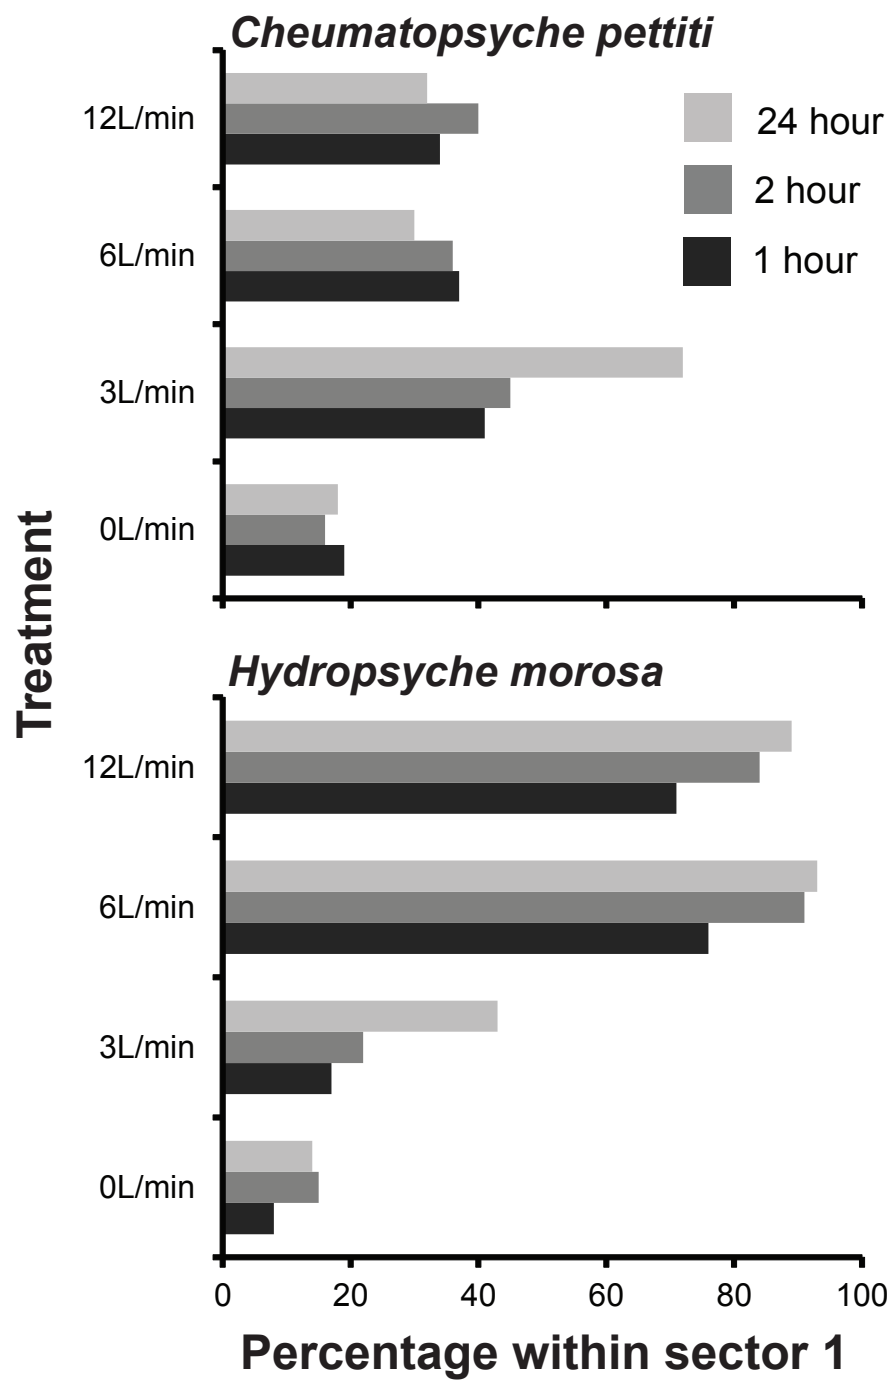

Source: https://cob.silverchair.com/jeb/article-pdf/doi/10.1242/jeb.110684/2033163/jeb_110684.pdf
